# Supplementary material for: Epstein–Barr virus LMP1 induces focal adhesions and epithelial cell migration through effects on integrin-α5 and N-cadherin
Source: PubMed Central journal article supplement (PMC4632092; doi:10.1038/oncsis.2015.31), 2015-10-19

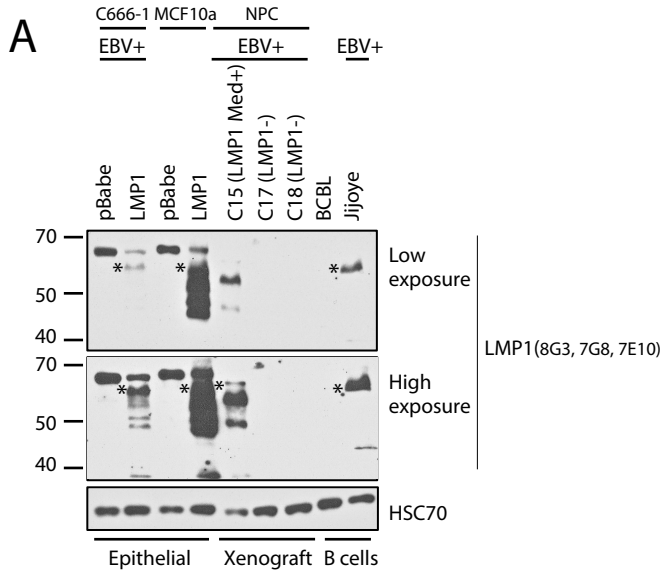

**qRT-PCR for LMP1 transcript**

| Cell Line/<br>NPC Xenograft | LMP1 Transcript<br>(% normalized to LCL) | Biological<br>Replicates |
|-----------------------------|------------------------------------------|--------------------------|
| LCL (EBV+)                  | 100±2.9                                  | 3                        |
| BJAB                        | 0                                        | 3                        |
| C15 (1) (EBV+/LMP1+)        | 116±6.1                                  | 2                        |
| C15 (2) (EBV+/LMP1+)        | 73.8±4.9                                 |                          |
| C17 (1) (EBV+/LMP1-)        | 0                                        | 2                        |
| C17 (2) (EBV+/LMP1-)        | 0                                        |                          |
| 293 (EBV+)                  | 6.5±0.98                                 | 3                        |
| 293                         | 0                                        | 3                        |
| NP460hTERT (EBV+)           | 0.8±0.013                                | 3                        |
| NP460hTERT                  | 0                                        | 3                        |
| HK1 (EBV+)                  | 0.98±0.39                                | 3                        |
| HK1                         | 0                                        | 3                        |

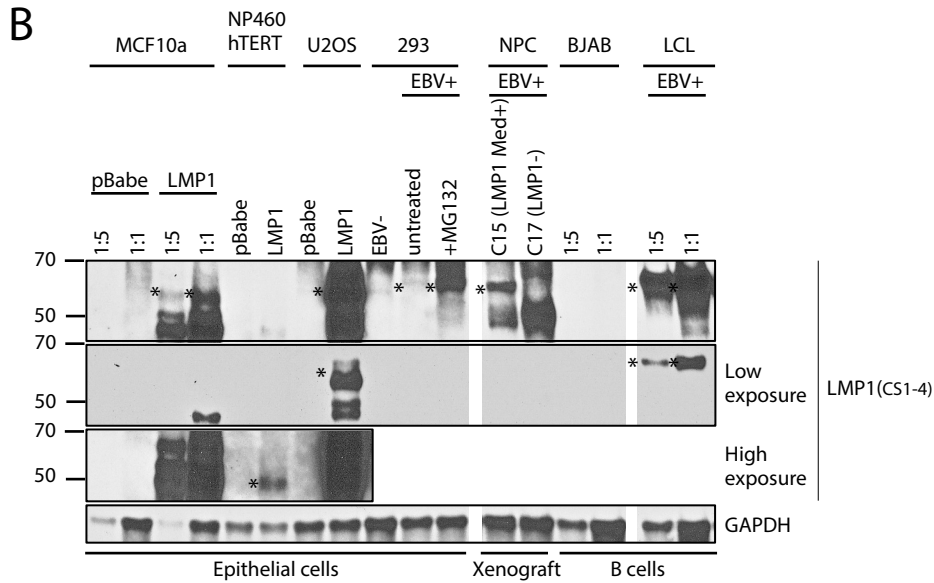

Supplement: oncsis201531x2.pdf [file oncsis201531x2.pdf]
